# Supplementary material for: EGCG Prevents the Onset of an Inflammatory and Cancer-Associated Adipocyte-like Phenotype in Adipose-Derived Mesenchymal Stem/Stromal Cells in Response to the Triple-Negative Breast Cancer Secretome
Source: MDPI journal article supplement (doi:10.3390/nu14051099), 2022-03-05
Supplement: s1 [file s1]

Supplemental.1

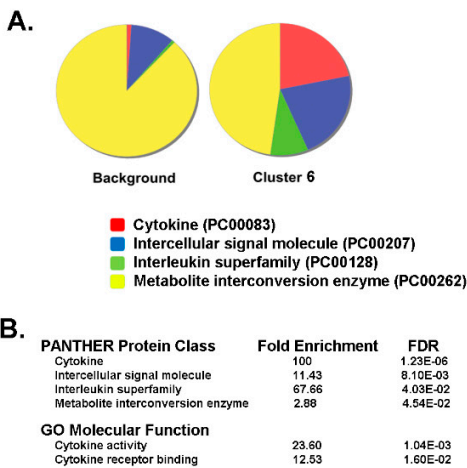

**Figure S1.** Enrichment analysis of the DEGs in Cluster 6. **(A)** Pie charts of protein class variation after a GO enrichment analysis showing the behavior of background genes and genes clustered in 6. **(B)** Fold enrichment values for protein class and molecular functions with a FDR  $\leq 0.05$  as a cut off, and using as background all genes detected.

## Supplemental.2

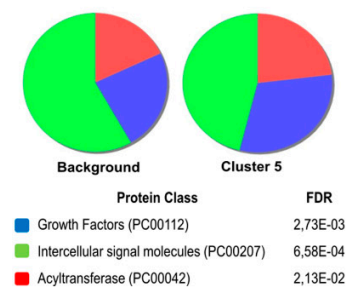

**Figure S2.** Gene ontology (GO) enrichment analysis results of genes from cluster 5. Pie chart of protein class variation with a false discovery rate (FDR)  $\leq 0.05$  as a cut off, and using all genes detected as background.
