# Supplementary material for: EGCG Prevents the Onset of an Inflammatory and Cancer-Associated Adipocyte-like Phenotype in Adipose-Derived Mesenchymal Stem/Stromal Cells in Response to the Triple-Negative Breast Cancer Secretome
Source: Nutrients. 2022 Mar 5;14(5):1099. doi: 10.3390/nu14051099 (PMC8912398; doi:10.3390/nu14051099)
Supplement: Supplementary file 1 [file nutrients-14-01099-s001.zip › Supplemental_3.xlsx]

## Sheet: Hoja1
ENSEMBL	Gene	Fold Change CM	Fold Change CM + EGCG	Cluster	Genes Minimal Description
ENSG00000196616	ADH1B	-1.04482	-5.98683	Cluster 1	ALCOHOL DEHYDROGENASE 1B
ENSG00000145242	EPHA5	-2.82356	-4.90958	Cluster 1	EPHRIN RECEPTOR EphA5
ENSG00000101265	RASSF2	-2.88471	-4.85385	Cluster 1	RAS ASSOCIATION DOMAIN FAMILY PROTEIN 2
ENSG00000178573	MAF	-3.16408	-4.34689	Cluster 1	ZIP TRANSCRIPTION FACTOR
ENSG00000013297	CLDN11	-3.20404	-4.4781	Cluster 1	CLAUDIN 11, OLIGODENDROCYTE TRANSMEMBRANE PROTEIN
ENSG00000116117	PARD3B	-3.21385	-4.86818	Cluster 1	Par-3 Family Cell Polarity Regulator Beta
ENSG00000164342	TLR3	-3.21544	-4.72365	Cluster 1	TOLL-LIKE RECEPTOR 3
ENSG00000137727	ARHGAP20	-3.28626	-4.17741	Cluster 1	RHO GTPase-ACTIVATING PROTEIN 20
ENSG00000151322	NPAS3	-3.31269	-5.15203	Cluster 1	NEURONAL PAS DOMAIN PROTEIN 3
ENSG00000136040	PLXNC1	-3.43386	-5.06615	Cluster 1	PLEXIN C1, VIRUS-ENCODED SEMAPHORIN PROTEIN RECEPTOR
ENSG00000239474	KLHL41	-3.44307	-4.48681	Cluster 1	KELCH-LIKE 41
ENSG00000156486	KCNS2	-3.45864	-4.68325	Cluster 1	POTASSIUM CHANNEL, VOLTAGE-GATED
ENSG00000126860	EVI2A	-3.46259	-5.64774	Cluster 1	ECOTROPIC VIRAL INTEGRATION SITE 2A
ENSG00000162981	LRATD1	-3.48412	-4.07206	Cluster 1	FAMILY WITH SEQUENCE SIMILARITY 84
ENSG00000141469	SLC14A1	-3.54538	-5.69388	Cluster 1	SOLUTE CARRIER FAMILY 14 (UREA TRANSPORTER)
ENSG00000183287	CCBE1	-3.55928	-5.75109	Cluster 1	COLLAGEN AND CALCIUM-BINDING EGF DOMAIN-CONTAINING PROTEIN 1
ENSG00000118898	PPL	-3.57925	-3.72502	Cluster 1	PERIPLAKIN
ENSG00000164440	TXLNB	-3.59194	-4.72002	Cluster 1	TAXILIN BETA
ENSG00000121743	GJA3	-3.6055	-4.82122	Cluster 1	GAP JUNCTION PROTEIN
ENSG00000144063	MALL	-3.62342	-4.49104	Cluster 1	T cell differentiation protein like
ENSG00000108381	ASPA	-3.65719	-4.59866	Cluster 1	ASPARTOACYLASE
ENSG00000138771	SHROOM3	-3.73285	-3.01127	Cluster 1	SHROOM FAMILY MEMBER 3
ENSG00000204131	NHSL2	-3.76711	-4.91785	Cluster 1	NHS-LIKE PROTEIN 2
ENSG00000184349	EFNA5	-3.79452	-3.25731	Cluster 1	EPHRIN A5, EPH-RELATED RECEPTOR TYROSINE KINASE LIGAND 7
ENSG00000106819	ASPN	-3.80347	-5.52137	Cluster 1	ASPORIN, PERIODONTAL LIGAMENT-ASSOCIATED PROTEIN 1
ENSG00000147481	SNTG1	-3.81746	-6.73317	Cluster 1	SYNTROPHIN
ENSG00000128594	LRRC4	-3.82959	-4.47749	Cluster 1	LEUCINE-RICH REPEAT-CONTAINING PROTEIN 4
ENSG00000117069	ST6GALNAC5	-3.86417	-5.44694	Cluster 1	6-sialyltransferase 5
ENSG00000115896	PLCL1	-3.91781	-5.33515	Cluster 1	PHOSPHOLIPASE C-LIKE 1
ENSG00000172318	B3GALT1	-3.96958	-4.47766	Cluster 1	BETA-3-GALACTOSYLTRANSFERASE 1
ENSG00000136999	CCN3	-3.97318	-6.41718	Cluster 1	NEPHROBLASTOMA OVEREXPRESSED GENE
ENSG00000112182	BACH2	-4.00251	-3.82935	Cluster 1	BASIC LEUCINE ZIPPER TRANSCRIPTION FACTOR 2
ENSG00000185742	C11orf87	-4.06669	-4.39655	Cluster 1	CHROMOSOME 11 OPEN READING FRAME 87
ENSG00000137975	CLCA2	-4.07259	-5.41734	Cluster 1	CHLORIDE CHANNEL ACCESSORY 2
ENSG00000204634	TBC1D8	-4.11063	-2.67047	Cluster 1	TBC1 DOMAIN FAMILY MEMBER 8
ENSG00000196730	DAPK1	-4.13285	-5.21173	Cluster 1	DEATH-ASSOCIATED PROTEIN KINASE 1
ENSG00000145526	CDH18	-4.14882	-5.38741	Cluster 1	CADHERIN 18
ENSG00000176438	SYNE3	-4.22037	-2.90913	Cluster 1	SPECTRIN REPEAT-CONTAINING NUCLEAR ENVELOPE PROTEIN 3
ENSG00000125378	BMP4	-4.32269	-4.4391	Cluster 1	BONE MORPHOGENETIC PROTEIN 4
ENSG00000072952	IRAG1	-4.32318	-5.88671	Cluster 1	INOSITOL 1,4,5-TRIPHOSPHATE-ASSOCIATED cGMP KINASE SUBSTRATE
ENSG00000002587	HS3ST1	-4.32962	-5.24552	Cluster 1	HEPARAN SULFATE (GLUCOSAMINE) 3-O-SULFOTRANSFERASE 1
ENSG00000117425	PTCH2	-4.39452	-4.58697	Cluster 1	PATCHED 2
ENSG00000185483	ROR1	-4.52931	-4.30305	Cluster 1	RECEPTOR TYROSINE KINASE-LIKE ORPHAN RECEPTOR 1
ENSG00000187955	COL14A1	-4.55759	-8.11748	Cluster 1	COLLAGEN TYPE XIV
ENSG00000171246	NPTX1	-4.58806	-3.59009	Cluster 1	PENTRAXIN I
ENSG00000029534	ANK1	-4.58994	-3.64196	Cluster 1	ANKYRIN 1 MUSCLE-SPECIFIC ISOFORM
ENSG00000164120	HPGD	-4.5925	-6.31683	Cluster 1	15-@HYDROXYPROSTAGLANDIN DEHYDROGENASE
ENSG00000133321	PLAAT4	-4.68267	-2.59525	Cluster 1	PHOSPHOLIPASE A AND ACYLTRANSFERASE 4
ENSG00000106809	OGN	-4.75264	-6.61851	Cluster 1	OSTEOGLYCIN, OSTEOINDUCTIVE FACTOR
ENSG00000153993	SEMA3D	-4.82191	-7.9808	Cluster 1	SEMAPHORIN 3D
ENSG00000127083	OMD	-4.87275	-4.40628	Cluster 1	OSTEOMODULIN
ENSG00000171873	ADRA1D	-4.98636	-2.52847	Cluster 1	ALPHA-1D-ADRENERGIC RECEPTOR
ENSG00000164236	ANKRD33B	-5.04855	-4.13795	Cluster 1	ANKYRIN REPEAT DOMAIN 33B
ENSG00000137265	IRF4	-5.05841	-4.76024	Cluster 1	INTERFERON REGULATORY FACTOR 4
ENSG00000122547	EEPD1	-5.1408	-4.32767	Cluster 1	ENDONUCLEASE/EXONUCLEASE/PHOSPHATASE FAMILY DOMAIN-CONTAINING PROTEIN 1
ENSG00000117643	MAN1C1	-5.14574	-4.43872	Cluster 1	MANNOSIDASE
ENSG00000185924	RTN4RL1	-5.29396	-5.21146	Cluster 1	RETICULON 4 RECEPTOR-LIKE 1
ENSG00000183346	CABCOCO1	-5.43747	-4.34593	Cluster 1	CILIARY ASSOCIATED CALCIUM BINDING COILED-COIL 1
ENSG00000124749	COL21A1	-5.46349	-5.32383	Cluster 1	COLLAGEN TYPE XXI
ENSG00000266524	GDF10	-5.55327	-5.688	Cluster 1	GROWTH/DIFFERENTIATION FACTOR 10
ENSG00000250722	SELENOP	-5.69457	-5.03286	Cluster 1	SELENOPROTEIN P
ENSG00000013293	SLC7A14	-5.91305	-7.42912	Cluster 1	SOLUTE CARRIER FAMILY 7
ENSG00000168497	CAVIN2	-6.09214	-4.47294	Cluster 1	CAVEOLAE-ASSOCIATED PROTEIN 2, SERUM DEPRIVATION RESPONSE PHOSPHATIDYLSERINE-BINDING PROTEIN
ENSG00000132561	MATN2	-1.00166	-5.72029	Cluster 2	MATRILIN 2
ENSG00000183775	KCTD16	-1.00588	-5.38163	Cluster 2	POTASSIUM CHANNEL TETRAMERIZATION DOMAIN-CONTAINING PROTEIN 16
ENSG00000163565	IFI16	-1.02488	-5.39771	Cluster 2	INTERFERON-GAMMA-INDUCIBLE PROTEIN 16
ENSG00000173517	PEAK1	-1.03265	-5.36699	Cluster 2	PSEUDOPODIUM-ENRICHED ATYPICAL KINASE 1
ENSG00000164761	TNFRSF11B	-1.04253	-7.9355	Cluster 2	TUMOR NECROSIS FACTOR RECEPTOR SUPERFAMILY
ENSG00000138193	PLCE1	-1.05235	-5.16974	Cluster 2	PHOSPHOLIPASE C EPSILON-1
ENSG00000140876	NUDT7	-1.07406	-5.72119	Cluster 2	NUDIX HYDROLASE 7
ENSG00000162600	OMA1	-1.07407	-6.34801	Cluster 2	OMA1 ZINC METALLOPEPTIDASE
ENSG00000137831	UACA	-1.0998	-7.33334	Cluster 2	UVEAL AUTOANTIGEN WITH COILED-COIL DOMAINS AND ANKYRIN REPEATS
ENSG00000188921	HACD4	-1.11729	-5.82944	Cluster 2	PROTEIN TYROSINE PHOSPHATASE-LIKE A DOMAIN-CONTAINING PROTEIN 2
ENSG00000152818	UTRN	-1.11979	-5.61637	Cluster 2	UTROPHIN
ENSG00000155011	DKK2	-1.12366	-6.51069	Cluster 2	DICKKOPF WNT SIGNALING PATHWAY INHIBITOR
ENSG00000133026	MYH10	-1.19971	-5.48504	Cluster 2	MYOSIN HEAVY CHAIN 10
ENSG00000189195	BTBD8	-1.20021	-5.28014	Cluster 2	KIAA1107 GENE
ENSG00000134853	PDGFRA	-1.21509	-6.29734	Cluster 2	PLATELET-DERIVED GROWTH FACTOR RECEPTOR ALPHA
ENSG00000156535	CD109	-1.21954	-5.56472	Cluster 2	CD109 PLATELET-SPECIFIC ANTIGEN SYSTEM GOV
ENSG00000136169	SETDB2	-1.23333	-5.26991	Cluster 2	SET DOMAIN PROTEIN BIFURCATED 2
ENSG00000145390	USP53	-1.23704	-6.82983	Cluster 2	UBIQUITIN-SPECIFIC PEPTIDASE 53
ENSG00000177409	SAMD9L	-1.27736	-8.7616	Cluster 2	STERILE ALPHA MOTIF DOMAIN-CONTAINING PROTEIN 9-LIKE
ENSG00000179388	EGR3	-1.27929	-5.79953	Cluster 2	EARLY GROWTH RESPONSE 3
ENSG00000145675	PIK3R1	-1.28505	-5.34345	Cluster 2	PHOSPHATIDYLINOSITOL 3-KINASE REGULATORY SUBUNIT 1
ENSG00000145632	PLK2	-1.28729	-5.77005	Cluster 2	POLO-LIKE KINASE 2
ENSG00000128872	TMOD2	-1.31702	-7.07577	Cluster 2	TROPOMODULIN 2
ENSG00000138758	SEPTIN11	-1.31717	-6.36797	Cluster 2	SEPTIN 11
ENSG00000197635	DPP4	-1.33342	-7.22478	Cluster 2	DIPEPTIDYL PEPTIDASE IV
ENSG00000135205	CCDC146	-1.34431	-5.49134	Cluster 2	COLIED-COIL DOMAIN CONTAINING 146
ENSG00000225830	ERCC6	-1.34646	-6.20575	Cluster 2	CHROMATIN REMODELING FACTOR
ENSG00000158270	COLEC12	-1.34951	-5.47838	Cluster 2	COLLECTIN 12, SCAVENGER RECEPTOR WITH C-TYPE LECTIN DOMAIN
ENSG00000144642	RBMS3	-1.36868	-5.57762	Cluster 2	RNA-BINDING MOTIF PROTEIN SINGLE STRAND-INTERACTING 3
ENSG00000230438	SERPINB9P1	-1.36952	-5.72946	Cluster 2	SERPIN FAMILY B MEMBER 9 PSEUDOGEN 1
ENSG00000170962	PDGFD	-1.3749	-6.1153	Cluster 2	PLATELET-DERIVED GROWTH FACTOR D
ENSG00000153246	PLA2R1	-1.4062	-5.55682	Cluster 2	PHOSPHOLIPASE A2 RECEPTOR 1
ENSG00000136044	APPL2	-1.42122	-5.25281	Cluster 2	ADAPTOR PROTEIN, PHOSPHOTYROSINE INTERACTION PH DOMAIN AND LEUCINE ZIPPER-CONTAINING PROTEIN 2
ENSG00000154654	NCAM2	-1.46348	-5.36672	Cluster 2	CELL ADHESION MOLECULE
ENSG00000164070	HSPA4L	-1.54279	-5.33539	Cluster 2	HEAT-SHOCK PROTEIN FAMILY A (HSP70) MEMBER 4-LIKE PROTEIN
ENSG00000139132	FGD4	-1.54829	-8.54693	Cluster 2	RhoGEF and PH domain containing 4
ENSG00000153291	SLC25A27	-1.66158	-5.82669	Cluster 2	SOLUTE CARRIER FAMILY 25
ENSG00000187098	MITF	-1.66574	-5.98823	Cluster 2	MICROPHTHALMIA-ASSOCIATED TRANSCRIPTION FACTOR
ENSG00000163412	EIF4E3	-1.68464	-5.6997	Cluster 2	EUKARYOTIC TRANSLATION INITIATION FACTOR 4E FAMILY
ENSG00000141447	OSBPL1A	-1.69041	-5.38593	Cluster 2	OXYSTEROL-BINDING PROTEIN-LIKE PROTEIN 1A
ENSG00000137962	ARHGAP29	-1.6992	-5.86302	Cluster 2	RHO GTPase-ACTIVATING PROTEIN 29
ENSG00000189184	PCDH18	-1.70055	-6.52179	Cluster 2	PROTOCADHERIN 18
ENSG00000154639	CXADR	-1.73122	-5.13899	Cluster 2	COXSACKIEVIRUS AND ADENOVIRUS RECEPTOR
ENSG00000163617	CCDC191	-1.74258	-5.1502	Cluster 2	COILED-COIL DOMAIN CONTAINING 191
ENSG00000196693	ZNF33B	-1.78311	-7.31845	Cluster 2	ZINC FINGER PROTEIN 33B
ENSG00000163536	SERPINI1	-1.81181	-5.92702	Cluster 2	SERINE PROTEASE INHIBITOR
ENSG00000154822	PLCL2	-1.82127	-6.22439	Cluster 2	PHOSPHOLIPASE C-LIKE 2
ENSG00000164309	CMYA5	-1.83958	-5.96064	Cluster 2	CARDIOMYOPATHY-ASSOCIATED PROTEIN 5
ENSG00000151491	EPS8	-1.88198	-5.48492	Cluster 2	EPIDERMAL GROWTH FACTOR RECEPTOR PATHWAY SUBSTRATE 8
ENSG00000187210	GCNT1	-1.92108	-5.73438	Cluster 2	GLUCOSAMINYL (N-ACETYL) TRANSFERASE 1
ENSG00000206538	VGLL3	-2.03297	-5.16816	Cluster 2	VESTIGIAL-LIKE 3
ENSG00000188906	LRRK2	-2.04574	-6.83106	Cluster 2	LEUCINE-RICH REPEAT KINASE 2
ENSG00000131016	AKAP12	-2.05952	-6.31197	Cluster 2	A-KINASE ANCHOR PROTEIN 12
ENSG00000169255	B3GALNT1	-2.08021	-6.34218	Cluster 2	3-N-acetylgalactosaminyltransferase 1 (globoside blood group)
ENSG00000127951	FGL2	-2.08445	-7.20929	Cluster 2	FIBRINOGEN-LIKE 2
ENSG00000164330	EBF1	-2.14064	-5.60647	Cluster 2	EARLY B-CELL FACTOR 1
ENSG00000183049	CAMK1D	-2.15277	-5.62947	Cluster 2	CALCIUM/CALMODULIN-DEPENDENT PROTEIN KINASE I-DELTA
ENSG00000129682	FGF13	-2.16972	-5.11737	Cluster 2	FIBROBLAST GROWTH FACTOR 13
ENSG00000169744	LDB2	-2.25083	-5.29561	Cluster 2	LIM DOMAIN-BINDING 2
ENSG00000143469	SYT14	-2.32592	-7.0061	Cluster 2	SYNAPTOTAGMIN 14
ENSG00000180263	FGD6	-2.33145	-7.25057	Cluster 2	RhoGEF and PH domain containing 6
ENSG00000142149	HUNK	-2.39102	-5.34739	Cluster 2	HORMONALLY UPREGULATED NEU-ASSOCIATED KINASE
ENSG00000134317	GRHL1	-2.39321	-5.49161	Cluster 2	GRAINYHEAD-LIKE 1
ENSG00000136531	SCN2A	-2.41879	-6.11322	Cluster 2	SODIUM VOLTAGE-GATED CHANNEL ALPHA SUBUNIT 2
ENSG00000197971	MBP	-2.46529	-5.40423	Cluster 2	MYELIN BASIC PROTEIN
ENSG00000168916	ZNF608	-2.55142	-5.42707	Cluster 2	Zinc FINGER PROTEIN 608
ENSG00000163827	LRRC2	-2.57377	-6.76328	Cluster 2	LEUCINE-RICH REPEAT-CONTAINING PROTEIN 2
ENSG00000154262	ABCA6	-2.58202	-8.76536	Cluster 2	ATP-BINDING CASSETTE SUBFAMILY A MEMBER 6
ENSG00000128536	CDHR3	-2.60116	-5.47663	Cluster 2	CADHERIN-RELATED FAMILY MEMBER 3
ENSG00000181804	SLC9A9	-2.62997	-5.30596	Cluster 2	SOLUTE CARRIER FAMILY 9 (SODIUM/HYDROGEN EXCHANGER) MEMBER 9
ENSG00000145362	ANK2	-2.71052	-6.12391	Cluster 2	ANKYRIN 2
ENSG00000183801	OLFML1	-2.99233	-6.68121	Cluster 2	OLFACTOMEDIN LIKE 1
ENSG00000151150	ANK3	-3.01765	-6.88782	Cluster 2	ANKYRIN 3
ENSG00000154258	ABCA9	-3.0553	-6.60114	Cluster 2	ATP-BINDING CASSETTE
ENSG00000138395	CDK15	-3.10113	-6.31298	Cluster 2	CYCLIN-DEPENDENT KINASE 15
ENSG00000172348	RCAN2	-3.15437	-7.4164	Cluster 2	REGULATOR OF CALCINEURIN 2
ENSG00000138735	PDE5A	-4.81736	-9.94656	Cluster 2	PHOSPHODIESTERASE 5A
ENSG00000140396	NCOA2	-1.00116	-4.59774	Cluster 3	NUCLEAR RECEPTOR COACTIVATOR 2
ENSG00000156026	MCU	-1.00553	-3.24861	Cluster 3	MITOCHONDRIAL CALCIUM UNIPORTER
ENSG00000150347	ARID5B	-1.01724	-4.23525	Cluster 3	AT-RICH INTERACTION DOMAIN-CONTAINING PROTEIN 5B
ENSG00000163879	DNALI1	-1.01944	-3.45206	Cluster 3	DYNEIN AXONEMAL LIGHT INTERMEDIATE POLYPEPTIDE 1
ENSG00000115414	FN1	-1.02446	-3.07021	Cluster 3	FIBRONECTIN 1
ENSG00000135931	ARMC9	-1.02576	-3.42241	Cluster 3	ARMADILLO REPEAT-CONTAINING PROTEIN 9
ENSG00000174628	IQCK	-1.04287	-3.30199	Cluster 3	IQ Motif Containing K
ENSG00000048740	CELF2	-1.04659	-4.69449	Cluster 3	CUGBP- AND ELAV-LIKE FAMILY MEMBER 2
ENSG00000118495	PLAGL1	-1.05857	-3.29663	Cluster 3	PLEOMORPHIC ADENOMA GENE-LIKE 1
ENSG00000115525	ST3GAL5	-1.05898	-3.85932	Cluster 3	ST3 BETA-GALACTOSIDE ALPHA-2,3-SIALYLTRANSFERASE 5
ENSG00000144746	ARL6IP5	-1.0627	-3.94667	Cluster 3	ADP-RIBOSYLATION FACTOR-LIKE GTPase 6-INTERACTING PROTEIN 5
ENSG00000096093	EFHC1	-1.074	-4.98501	Cluster 3	EF-HAND DOMAIN (C-TERMINAL)-CONTAINING PROTEIN 1
ENSG00000155085	AK9	-1.07683	-4.47391	Cluster 3	ADENYLATE KINASE 9
ENSG00000132849	PATJ	-1.0779	-3.72773	Cluster 3	PALS1-ASSOCIATED TIGHT JUNCTION PROTEIN
ENSG00000164099	PRSS12	-1.09081	-3.08024	Cluster 3	PROTEASE SERINE 12
ENSG00000077063	CTTNBP2	-1.09869	-3.31575	Cluster 3	CORTACTIN-BINDING PROTEIN 2
ENSG00000136960	ENPP2	-1.10024	-3.9088	Cluster 3	ECTONUCLEOTIDE PYROPHOSPHATASE/PHOSPHODIESTERASE 2
ENSG00000147162	OGT	-1.12155	-3.48656	Cluster 3	O-LINKED N-ACETYLGLUCOSAMINE TRANSFERASE
ENSG00000164463	CREBRF	-1.12369	-3.93238	Cluster 3	CREB3 RECRUITMENT FACTOR
ENSG00000165322	ARHGAP12	-1.12445	-4.34572	Cluster 3	RHO GTPase-ACTIVATING PROTEIN 12
ENSG00000188312	CENPP	-1.13384	-3.5339	Cluster 3	CENTROMERIC PROTEIN P
ENSG00000164619	BMPER	-1.13731	-4.37189	Cluster 3	BONE MORPHOGENETIC PROTEIN-BINDING ENDOTHELIAL REGULATOR PROTEIN
ENSG00000147862	NFIB	-1.13948	-4.80088	Cluster 3	NUCLEAR FACTOR I/B
ENSG00000120738	EGR1	-1.14086	-4.23491	Cluster 3	EARLY GROWTH RESPONSE 1
ENSG00000148057	IDNK	-1.14738	-4.39434	Cluster 3	CHROMOSOME 9 OPEN READING FRAME 103
ENSG00000147027	TMEM47	-1.15439	-4.77956	Cluster 3	TRANSMEMBRANE PROTEIN 47
ENSG00000118515	SGK1	-1.15833	-3.77413	Cluster 3	SERUM/GLUCOCORTICOID-REGULATED KINASE 1
ENSG00000169432	SCN9A	-1.15859	-4.28311	Cluster 3	SODIUM VOLTAGE-GATED CHANNEL ALPHA SUBUNIT 9
ENSG00000109472	CPE	-1.16103	-4.31143	Cluster 3	CARBOXYPEPTIDASE E
ENSG00000126016	AMOT	-1.17059	-4.12845	Cluster 3	ANGIOMOTIN
ENSG00000140199	SLC12A6	-1.17389	-3.78735	Cluster 3	SOLUTE CARRIER FAMILY 12 (POTASSIUM/CHLORIDE TRANSPORTER), MEMBER 6
ENSG00000185760	KCNQ5	-1.17699	-3.50151	Cluster 3	POTASSIUM CHANNEL VOLTAGE-GATED KQT-LIKE SUBFAMILY MEMBER 5
ENSG00000100490	CDKL1	-1.18139	-4.10709	Cluster 3	CYCLIN-DEPENDENT KINASE-LIKE 1
ENSG00000122643	NT5C3A	-1.18238	-4.40886	Cluster 3	CYTOSOLYC IIIA,5-PRIME-αNUCLEOTIDASE
ENSG00000152217	SETBP1	-1.18331	-3.96557	Cluster 3	SET-BINDING PROTEIN 1
ENSG00000129675	ARHGEF6	-1.18669	-4.89909	Cluster 3	RHO GUANINE NUCLEOTIDE EXCHANGE FACTOR 6
ENSG00000107960	STN1	-1.18837	-3.56335	Cluster 3	CST COMPLEX SUBUNIT
ENSG00000198542	ITGBL1	-1.19348	-4.65344	Cluster 3	INTEGRIN BETA-LIKE 1
ENSG00000110427	KIAA1549L	-1.19647	-3.5928	Cluster 3	CHROMOSOME 11 OPEN READING FRAME 41; C11ORF41;;G2
ENSG00000168491	CCDC110	-1.19764	-4.15439	Cluster 3	CANCER/TESTIS ANTIGEN KM-HN-1
ENSG00000145687	SSBP2	-1.19909	-3.3291	Cluster 3	SINGLE-STRANDED DNA-BINDING PROTEIN 2
ENSG00000164694	FNDC1	-1.20352	-4.0901	Cluster 3	FIBRONECTIN TYPE III DOMAIN-CONTAINING PROTEIN 1
ENSG00000126775	ATG14	-1.21346	-3.74034	Cluster 3	AUTOPHAGY-RELATED 14
ENSG00000173275	ZNF449	-1.23042	-4.39596	Cluster 3	ZINC FINGER PROTEIN 449
ENSG00000100767	PAPLN	-1.23467	-3.28718	Cluster 3	PROTEOGLYCAN-LIKE SULFATED GLYCOPROTEIN
ENSG00000188993	LRRC66	-1.23818	-4.48575	Cluster 3	LEUCINE RICH REPEAT CONTAINING 66
ENSG00000144645	OSBPL10	-1.24709	-3.64322	Cluster 3	OXYSTEROL-BINDING PROTEIN-LIKE PROTEIN 10
ENSG00000163513	TGFBR2	-1.25772	-4.29047	Cluster 3	TRANSFORMING GROWTH FACTOR-BETA RECEPTOR TYPE II
ENSG00000149218	ENDOD1	-1.26645	-4.56342	Cluster 3	ENDONUCEASE DOMAIN CONTAINING 1
ENSG00000170035	UBE2E3	-1.26777	-3.39541	Cluster 3	UBIQUITIN-CONJUGATING ENZYME E2E 3
ENSG00000068305	MEF2A	-1.28028	-4.42109	Cluster 3	MADS BOX TRANSCRIPTION ENHANCER FACTOR 2
ENSG00000153558	FBXL2	-1.31135	-4.78587	Cluster 3	F-BOX AND LEUCINE-RICH REPEAT PROTEIN 2
ENSG00000214595	EML6	-1.31141	-3.47857	Cluster 3	ECHINODERM MICROTUBULE ASSOCIATED PROTEIN LIKE 6
ENSG00000066027	PPP2R5A	-1.31233	-3.47617	Cluster 3	PROTEIN PHOSPHATASE 2
ENSG00000172965	MIR4435-2HG	-1.32242	-3.66023	Cluster 3	MICRO RNA 4435-2 HOST GENE
ENSG00000127863	TNFRSF19	-1.32599	-3.29967	Cluster 3	TUMOR NECROSIS FACTOR RECEPTOR SUPERFAMILY MEMBER 19
ENSG00000150593	PDCD4	-1.32857	-4.08927	Cluster 3	PROGRAMMED CELL DEATH 4, NEOPLASTIC TRANSFORMATION INHIBITOR
ENSG00000143387	CTSK	-1.33198	-3.21414	Cluster 3	CATHEPSIN K
ENSG00000137752	CASP1	-1.33481	-4.1072	Cluster 3	CASPASE 1, APOPTOSIS-RELATED CYSTEINE PROTEASE
ENSG00000155324	GRAMD2B	-1.35967	-3.48598	Cluster 3	GRAM Domain Containing 2B
ENSG00000104324	CPQ	-1.36778	-3.37719	Cluster 3	CARBOXYPEPTIDASE Q
ENSG00000031003	FAM13B	-1.3735	-3.92975	Cluster 3	CHROMOSOME 5 OPEN READING FRAME 5
ENSG00000167081	PBX3	-1.37501	-3.48067	Cluster 3	PRE-B-CELL LEUKEMIA TRANSCRIPTION FACTOR 3
ENSG00000138411	HECW2	-1.39709	-3.18778	Cluster 3	C2 AND WW DOMAINS-CONTAINING E3 UBIQUITIN-PROTEIN LIGASE 2
ENSG00000071205	ARHGAP10	-1.4066	-3.19303	Cluster 3	RHO GTPase-ACTIVATING PROTEIN 10
ENSG00000185745	IFIT1	-1.41191	-4.57849	Cluster 3	INTERFERON-INDUCED PROTEIN WITH TETRATRICOPEPTIDE REPEATS 1
ENSG00000179104	TMTC2	-1.41206	-3.5406	Cluster 3	TRANSMEMBRANE AND TETRATRICOPEPTIDE REPEAT DOMAINS-CONTAINING PROTEIN 2
ENSG00000154027	AK5	-1.41564	-4.60221	Cluster 3	ADENYLATE KINASE 5
ENSG00000134531	EMP1	-1.42284	-3.84405	Cluster 3	EPITHELIAL MEMBRANE PROTEIN 1P
ENSG00000205683	DPF3	-1.43109	-4.33561	Cluster 3	ZINC AND DOUBLE PHD FINGERS FAMILY
ENSG00000065534	MYLK	-1.43181	-4.25867	Cluster 3	MYOSIN LIGHT CHAIN KINASE
ENSG00000011523	CEP68	-1.44079	-4.56402	Cluster 3	CENTROSOMAL PROTEIN 68-KD
ENSG00000178695	KCTD12	-1.44679	-4.16739	Cluster 3	POTASSIUM CHANNEL TETRAMERIZATION DOMAIN-CONTAINING PROTEIN 12
ENSG00000064763	FAR2	-1.45593	-4.39888	Cluster 3	FATTY ACYL CoA REDUCTASE 2
ENSG00000158122	PRXL2C	-1.46387	-3.55185	Cluster 3	PEROXIREDOXIN LIKE 2C
ENSG00000104435	STMN2	-1.46937	-4.73218	Cluster 3	STATHMIN-LIKE 2
ENSG00000104381	GDAP1	-1.47305	-4.86563	Cluster 3	GANGLIOSIDE-INDUCED DIFFERENTIATION-ASSOCIATED PROTEIN 1
ENSG00000156463	SH3RF2	-1.49249	-3.98811	Cluster 3	SH3 DOMAIN-CONTAINING RING FINGER PROTEIN 2
ENSG00000125945	ZNF436	-1.50166	-3.41443	Cluster 3	ZINC FINGER PROTEIN 436
ENSG00000099204	ABLIM1	-1.52686	-5.06922	Cluster 3	ACTIN-BINDING LIM PROTEIN FAMILY MEMBER 1
ENSG00000116667	C1orf21	-1.53658	-4.67202	Cluster 3	CHROMOSOME 1 OPEN READING FRAME 21
ENSG00000169239	CA5B	-1.55731	-3.40964	Cluster 3	CARBONIC ANHYDRASE VB MITOCHONDRIAL
ENSG00000047648	ARHGAP6	-1.55914	-3.77648	Cluster 3	RHO GTPase-ACTIVATING PROTEIN 6
ENSG00000168016	TRANK1	-1.56064	-3.51742	Cluster 3	TETRATRICOPEPTIDE AND ANKRYN REPEAT CONTAINING 1
ENSG00000136235	GPNMB	-1.56841	-3.57324	Cluster 3	GLYCOPROTEIN NMB
ENSG00000163171	CDC42EP3	-1.58228	-4.56536	Cluster 3	CDC42 EFFECTOR PROTEIN 3
ENSG00000138119	MYOF	-1.58298	-4.81055	Cluster 3	MYOFERLIN
ENSG00000157483	MYO1E	-1.60146	-4.61576	Cluster 3	MYOSIN IE
ENSG00000114670	NEK11	-1.61505	-4.52459	Cluster 3	NEVER IN MITOSIS GENE A-RELATED KINASE 11
ENSG00000139263	LRIG3	-1.63347	-4.45294	Cluster 3	LEUCINE-RICH REPEATS- AND IMMUNOGLOBULIN-LIKE DOMAINS-CONTAINING PROTEIN 3
ENSG00000155016	CYP2U1	-1.65091	-4.51978	Cluster 3	CYTOCHROME P450 FAMILY 2 SUBFAMILY U
ENSG00000145819	ARHGAP26	-1.67884	-4.46925	Cluster 3	RHO GTPase-ACTIVATING PROTEIN 26
ENSG00000102387	TAF7L	-1.68789	-4.34485	Cluster 3	TATA BOX-BINDING PROTEIN-ASSOCIATED FACTOR 7-LIKE
ENSG00000156299	TIAM1	-1.69285	-3.42867	Cluster 3	T-CELL LYMPHOMA INVASION AND METASTASIS 1
ENSG00000112297	CRYBG1	-1.6971	-4.59765	Cluster 3	ABSENT IN MELANOMA 1
ENSG00000091656	ZFHX4	-1.70425	-3.35554	Cluster 3	ZINC FINGER HOMEOBOX 4
ENSG00000166974	MAPRE2	-1.70569	-3.32931	Cluster 3	MICROTUBULE-ASSOCIATED PROTEIN RP/EB FAMILY MEMBER 2
ENSG00000054654	SYNE2	-1.70859	-4.16597	Cluster 3	SPECTRIN REPEAT-CONTAINING NUCLEAR ENVELOPE PROTEIN 2CONNECTING ELEMENT
ENSG00000163596	ICA1L	-1.71772	-4.21151	Cluster 3	ISLET CELL AUTOANTIGEN 1 LIKE
ENSG00000166035	LIPC	-1.71851	-5.05855	Cluster 3	LIPASE, HEPATIC
ENSG00000132274	TRIM22	-1.73236	-4.81215	Cluster 3	TRIPARTITE MOTIF-CONTAINING PROTEIN 22
ENSG00000058668	ATP2B4	-1.73469	-4.47021	Cluster 3	ATPase, Ca(2+)-TRANSPORTING, PLASMA MEMBRANE, 4
ENSG00000151693	ASAP2	-1.73698	-4.54041	Cluster 3	DEVELOPMENT- AND DIFFERENTIATION-ENHANCING FACTOR 2
ENSG00000185432	METTL7A	-1.73882	-4.09908	Cluster 3	METHYLTRANSFERASE-LIKE 7A
ENSG00000120658	ENOX1	-1.75513	-4.21822	Cluster 3	ECTO-NOX DISULFIDE-THIOL EXCHANGER 1
ENSG00000124942	AHNAK	-1.75543	-4.83927	Cluster 3	AHNAK NUCLEOPROTEIN
ENSG00000138131	LOXL4	-1.7694	-3.25616	Cluster 3	LYSYL OXIDASE-LIKE 4
ENSG00000120549	KIAA1217	-1.77	-3.2565	Cluster 3	KIAA1217 GENE
ENSG00000081189	MEF2C	-1.78327	-3.17168	Cluster 3	MADS BOX TRANSCRIPTION ENHANCER FACTOR 2
ENSG00000138675	FGF5	-1.78328	-4.32936	Cluster 3	FIBROBLAST GROWTH FACTOR 5
ENSG00000054392	HHAT	-1.78791	-4.49523	Cluster 3	HEDGEHOG ACYLTRANSFERASE, MELANOMA ANTIGEN RECOGNIZED BY T CELLS 2
ENSG00000091986	CCDC80	-1.79712	-4.51371	Cluster 3	COILED-COIL DOMAIN-CONTAINING PROTEIN 80
ENSG00000221818	EBF2	-1.80284	-4.00162	Cluster 3	EARLY B-CELL FACTOR 2
ENSG00000100342	APOL1	-1.8038	-3.32352	Cluster 3	APOLIPOPROTEIN L-I
ENSG00000162407	PLPP3	-1.81668	-4.96309	Cluster 3	PHOSPHOLIPID PHOSPHATASE 3
ENSG00000035664	DAPK2	-1.82428	-3.80329	Cluster 3	DEATH-ASSOCIATED PROTEIN KINASE 2
ENSG00000197872	CYRIA	-1.82776	-4.42854	Cluster 3	CYFIP RELATED RAC 1 INTEARCTOR A
ENSG00000105974	CAV1	-1.83692	-3.99295	Cluster 3	CAVEOLIN 1
ENSG00000152465	NMT2	-1.84953	-4.60806	Cluster 3	N-MYRISTOYLTRANSFERASE 2
ENSG00000138356	AOX1	-1.85481	-4.42294	Cluster 3	ALDEHYDE OXIDASE 1
ENSG00000118777	ABCG2	-1.87148	-3.81379	Cluster 3	ATP-BINDING CASSETTE, SUBFAMILY G
ENSG00000159784	FAM131B	-1.87759	-3.12422	Cluster 3	FAMILY WITH SEQUENCE SIMILARITY 131 Member B
ENSG00000079102	RUNX1T1	-1.8782	-4.03616	Cluster 3	RUNT-RELATED TRANSCRIPTION FACTOR 1
ENSG00000160097	FNDC5	-1.91256	-4.95792	Cluster 3	FIBRONECTIN TYPE III DOMAIN-CONTAINING PROTEIN 5
ENSG00000196104	SPOCK3	-1.9206	-4.49843	Cluster 3	CWCV AND KAZAL LIKE DOMAINS PROTEOGLYCAN 3
ENSG00000110436	SLC1A2	-1.92632	-3.81693	Cluster 3	SOLUTE CARRIER FAMILY 1 (GLIAL HIGH AFFINITY GLUTAMATE TRANSPORTER), MEMBER 2
ENSG00000070882	OSBPL3	-1.93261	-4.24689	Cluster 3	OXYSTEROL-BINDING PROTEIN-LIKE PROTEIN 3
ENSG00000163947	ARHGEF3	-1.94041	-4.15307	Cluster 3	RHO GUANINE NUCLEOTIDE EXCHANGE FACTOR 3
ENSG00000133107	TRPC4	-1.94049	-4.31254	Cluster 3	TRANSIENT RECEPTOR POTENTIAL CATION CHANNEL SUBFAMILY C MEMBER 4
ENSG00000071967	CYBRD1	-1.94256	-4.84808	Cluster 3	CYTOCHROME b REDUCTASE 1
ENSG00000153721	CNKSR3	-1.97186	-4.46048	Cluster 3	CNKSR FAMILY MEMBER 3
ENSG00000196639	HRH1	-1.98066	-3.24513	Cluster 3	HISTAMINE RECEPTOR H1
ENSG00000147437	GNRH1	-1.98087	-5.04538	Cluster 3	GONADOTROPIN-RELEASING HORMONE 1
ENSG00000149256	TENM4	-2.00421	-4.05103	Cluster 3	TENEURIN TRANSMEMBRANE PROTEIN 4
ENSG00000196159	FAT4	-2.00702	-4.32425	Cluster 3	FAT ATYPICAL CADHERIN 4
ENSG00000165124	SVEP1	-2.01247	-3.9202	Cluster 3	VON WILLEBRAND FACTOR TYPE A, EGF AND PENTRAXIN DOMAIN CONTAINING 1
ENSG00000148798	INA	-2.05363	-4.41747	Cluster 3	INTERNEXIN ALPHA
ENSG00000081377	CDC14B	-2.10824	-3.61338	Cluster 3	CELL DIVISION CYCLE 14B; CDC14B;;CELL DIVISION CYCLE 14, S. CEREVISIAE, HOMOLOG B
ENSG00000176771	NCKAP5	-2.12911	-4.29067	Cluster 3	NCK-ASSOCIATED PROTEIN 5
ENSG00000145349	CAMK2D	-2.14382	-4.92748	Cluster 3	CALCIUM/CALMODULIN-DEPENDENT PROTEIN KINASE II-DELTA
ENSG00000182836	PLCXD3	-2.15975	-4.75078	Cluster 3	PHOSPHOLIPASE C PHOSPHATIDYLINOSITOL-SPECIFIC X DOMAIN-CONTAINING PROTEIN 3
ENSG00000136826	KLF4	-2.18887	-3.44462	Cluster 3	ENDOTHELIAL KRUPPEL-LIKE ZINC FINGER PROTEIN
ENSG00000184408	KCND2	-2.21382	-4.2327	Cluster 3	POTASSIUM VOLTAGE-GATED CHANNEL SHAL-RELATED SUBFAMILY MEMBER 2
ENSG00000111261	MANSC1	-2.26577	-3.65783	Cluster 3	MANSC DOMAIN CONTAINING 1
ENSG00000183454	GRIN2A	-2.28946	-4.72002	Cluster 3	GLUTAMATE RECEPTOR IONOTROPIC N-METHYL-D-ASPARTATE SUBUNIT 2A
ENSG00000197321	SVIL	-2.29972	-4.93237	Cluster 3	SUPERVILLIN
ENSG00000061918	GUCY1B1	-2.30442	-4.71416	Cluster 3	GUANYLATE CYCLASE 1, NITRIC OXIDE-SENSITIVE GUANYLYL CYCLASE, BETA-1 SUBUNIT
ENSG00000154065	ANKRD29	-2.36093	-4.70483	Cluster 3	ANKYRIN REPEAT DOMAIN 29
ENSG00000170271	FAXDC2	-2.37787	-4.10226	Cluster 3	FATTY ACID HYDROXYLASE DOMAIN CONTAINING 2
ENSG00000076716	GPC4	-2.42257	-3.51541	Cluster 3	GLYPICAN 4
ENSG00000135842	NIBAN1	-2.47137	-3.22178	Cluster 3	NIBAN APOPTOSIS REGULATOR 1
ENSG00000163071	SPATA18	-2.49103	-3.49862	Cluster 3	SPERMATOGENESIS-ASSOCIATED PROTEIN 18
ENSG00000168079	SCARA5	-2.5542	-4.53583	Cluster 3	SCAVENGER RECEPTOR CLASS A MEMBER 5
ENSG00000149212	SESN3	-2.55673	-3.9527	Cluster 3	SESTRIN 3
ENSG00000126950	TMEM35A	-2.63535	-4.10192	Cluster 3	TRANSMEMBRANE PROTEIN 35A
ENSG00000107562	CXCL12	-2.63781	-3.98366	Cluster 3	CHEMOKINE CXC MOTIF LIGAND 12
ENSG00000172296	SPTLC3	-2.64125	-4.16207	Cluster 3	SERINE PALMITOYLTRANSFERASE LONG-CHAIN BASE SUBUNIT 3
ENSG00000106823	ECM2	-2.66705	-4.75913	Cluster 3	EXTRACELLULAR MATRIX PROTEIN 2
ENSG00000144730	IL17RD	-2.7188	-4.37105	Cluster 3	INTERLEUKIN 17 RECEPTOR D
ENSG00000197046	SIGLEC15	-2.79705	-3.22342	Cluster 3	SIALIC ACID-BINDING IMMUNOGLOBULIN-LIKE LECTIN 15
ENSG00000155792	DEPTOR	-2.81384	-4.29245	Cluster 3	DEP DOMAIN-CONTAINING PROTEIN 6
ENSG00000053747	LAMA3	-2.87219	-3.86413	Cluster 3	LAMININ ALPHA-3
ENSG00000166448	TMEM130	-3.10214	-3.18171	Cluster 3	TRANSMEMBRANE PROTEIN 130
ENSG00000101134	DOK5	-1.00563	-1.41327	Cluster 4	DOCKING PROTEIN 5
ENSG00000006740	ARHGAP44	-1.00824	-3.0513	Cluster 4	RHO GTPase-ACTIVATING PROTEIN 44
ENSG00000145358	DDIT4L	-1.00916	-1.2953	Cluster 4	DNA DAMAGE-INDUCIBLE TRANSCRIPT 4-LIKE
ENSG00000144455	SUMF1	-1.01741	-1.02887	Cluster 4	SULFATASE-MODIFYING FACTOR 1
ENSG00000173706	HEG1	-1.01894	-2.62656	Cluster 4	HEART OF GLASS
ENSG00000001461	NIPAL3	-1.03029	-2.7891	Cluster 4	NIPA LIKE DOMAIN CONTAINING 3
ENSG00000136003	ISCU	-1.03502	-1.49302	Cluster 4	IRON-SULFUR CLUSTER ASSEMBLY ENZYME
ENSG00000108001	EBF3	-1.03578	-2.95786	Cluster 4	EARLY B-CELL FACTOR 3, COLLIER/OLF1/EBF TRANSCRIPTION FACTOR 3
ENSG00000107554	DNMBP	-1.03592	-2.4522	Cluster 4	DYNAMIN-BINDING PROTEIN
ENSG00000048471	SNX29	-1.03652	-1.03389	Cluster 4	SORTING NEXIN 29
ENSG00000139910	NOVA1	-1.03849	-1.80304	Cluster 4	NEUROONCOLOGIC VENTRAL ANTIGEN 1
ENSG00000026950	BTN3A1	-1.04411	-1.06577	Cluster 4	BUTYROPHILIN SUBFAMILY 3 MEMBER A1
ENSG00000187239	FNBP1	-1.04526	-1.97801	Cluster 4	FORMIN-BINDING PROTEIN 1
ENSG00000254122	PCDHGB7	-1.0464	-1.37095	Cluster 4	PROTOCADHERIN-GAMMA, SUBFAMILY B, MEMBER 7
ENSG00000119280	C1orf198	-1.04989	-1.49072	Cluster 4	CHROMOSOME 1 OPEN READING FRAME 198
ENSG00000110090	CPT1A	-1.05006	-2.55577	Cluster 4	CARNITINE PALMITOYLTRANSFERASE I
ENSG00000186665	C17orf58	-1.06683	-1.99806	Cluster 4	CHROMOSOME 17 OPEN READING FRAME 58
ENSG00000239521	CASTOR3	-1.06729	-1.97336	Cluster 4	CASTOR Family Member 3
ENSG00000109787	KLF3	-1.07406	-2.31559	Cluster 4	KRUPPEL-LIKE FACTOR 3
ENSG00000162105	SHANK2	-1.07618	-2.006	Cluster 4	SH3 AND MULTIPLE ANKYRIN REPEAT DOMAINS 2
ENSG00000133059	DSTYK	-1.08166	-2.74145	Cluster 4	DUAL SERINE/THREONINE AND TYROSINE PROTEIN KINASE, RECEPTOR-INTERACTING SERINE/THREONINE KINASE 5
ENSG00000167065	DUSP18	-1.08539	-1.90547	Cluster 4	DUAL-SPECIFICITY PHOSPHATASE 18
ENSG00000115935	WIPF1	-1.09319	-2.64851	Cluster 4	WAS/WASL-INTERACTING PROTEIN FAMILY MEMBER 1
ENSG00000108950	FAM20A	-1.09331	-2.40402	Cluster 4	FAMILY WITH SEQUENCE SIMILARITY 20 MEMBER A
ENSG00000187391	MAGI2	-1.09999	-1.38504	Cluster 4	MEMBRANE-ASSOCIATED GUANYLATE KINASE, WW AND PDZ DOMAINS-CONTAINING, 2
ENSG00000163710	PCOLCE2	-1.10075	-2.02224	Cluster 4	PROCOLLAGEN C-ENDOPEPTIDASE ENHANCER 2
ENSG00000154529	CNTNAP3B	-1.10678	-2.14391	Cluster 4	CONTACTIN ASSOCIATED PROTEIN FAMILY MEMBER 3B
ENSG00000162599	NFIA	-1.13015	-2.12629	Cluster 4	NUCLEAR FACTOR I/A
ENSG00000185189	NRBP2	-1.13016	-1.4792	Cluster 4	NUCLEAR RECEPTOR-BINDING PROTEIN 2
ENSG00000164938	TP53INP1	-1.13668	-1.92974	Cluster 4	TUMOR PROTEIN p53-INDUCIBLE NUCLEAR PROTEIN 1
ENSG00000134698	2004-08-01	-1.1376	-2.79809	Cluster 4	EUKARYOTIC TRANSLATION INITIATION FACTOR 2C, SUBUNIT 4
ENSG00000106483	SFRP4	-1.13797	-2.59978	Cluster 4	SECRETED FRIZZLED-RELATED PROTEIN 4
ENSG00000101384	JAG1	-1.14077	-1.61964	Cluster 4	JAGGED 1
ENSG00000132793	LPIN3	-1.14758	-1.99857	Cluster 4	LIPIN 3
ENSG00000136002	ARHGEF4	-1.1482	-1.8864	Cluster 4	RHO GUANINE NUCLEOTIDE EXCHANGE FACTOR 4
ENSG00000111271	ACAD10	-1.15057	-1.06184	Cluster 4	ACYL-CoA DEHYDROGENASE FAMILY, MEMBER 10; ACAD10
ENSG00000106571	GLI3	-1.15122	-2.17407	Cluster 4	GLI-KRUPPEL FAMILY MEMBER 3
ENSG00000104365	IKBKB	-1.16587	-1.74533	Cluster 4	INHIBITOR OF NUCLEAR FACTOR KAPPA-B KINASE SUBUNIT BETA
ENSG00000197256	KANK2	-1.17622	-2.62706	Cluster 4	KN MOTIF- AND ANKYRIN REPEAT DOMAIN-CONTAINING PROTEIN 2
ENSG00000135899	SP110	-1.17689	-2.34485	Cluster 4	NUCLEAR BODY PROTEIN SP110, INTRACELLULAR PATHOGEN RESISTANCE 1
ENSG00000266094	RASSF5	-1.17799	-1.71976	Cluster 4	RAS ASSOCIATION DOMAIN FAMILY PROTEIN 5
ENSG00000172667	ZMAT3	-1.19738	-2.6108	Cluster 4	WILDTYPE p53-INDUCED GENE
ENSG00000138639	ARHGAP24	-1.2025	-2.44655	Cluster 4	RHO GTPase-ACTIVATING PROTEIN 24
ENSG00000117616	RSRP1	-1.20857	-2.25492	Cluster 4	ARGININE AND SERINE RICH PROTEIN 1
ENSG00000130956	HABP4	-1.21184	-2.89974	Cluster 4	HYALURONAN-BINDING PROTEIN 4
ENSG00000183060	LYSMD4	-1.21332	-1.83929	Cluster 4	LysM DOMAIN CONTAINING 4
ENSG00000065308	TRAM2	-1.22238	-1.38845	Cluster 4	TRANSLOCATION-ASSOCIATED MEMBRANE PROTEIN 2
ENSG00000132386	SERPINF1	-1.22444	-1.48429	Cluster 4	SERPIN PEPTIDASE INHIBITOR CLADE F MEMBER 1
ENSG00000010278	CD9	-1.22489	-1.2717	Cluster 4	LEUKOCYTE ANTIGEN MIC3
ENSG00000116717	GADD45A	-1.22504	-1.74606	Cluster 4	GROWTH ARREST- AND DNA DAMAGE-INDUCIBLE GENE GADD45
ENSG00000163820	FYCO1	-1.23833	-1.88497	Cluster 4	FYVE AND COILED-COIL DOMAIN CONTAINING 1
ENSG00000164010	ERMAP	-1.23892	-1.3158	Cluster 4	ERYTHROBLAST MEMBRANE-ASSOCIATED PROTEIN
ENSG00000100100	PIK3IP1	-1.24169	-1.15798	Cluster 4	PHOSSPHOINOSITIDE-3-KINASE INTERACTING PROTEIN 1
ENSG00000168781	PPIP5K1	-1.24395	-2.66701	Cluster 4	DIPHOSPHOINOSITOL PENTAKISPHOSPHATE KINASE 1
ENSG00000266028	SRGAP2	-1.24647	-1.10272	Cluster 4	SLIT-ROBO RHO GTPase-ACTIVATING PROTEIN 2
ENSG00000141542	RAB40B	-1.25807	-1.66412	Cluster 4	MEMBER RAS ONCOGENE FAMILY
ENSG00000073910	FRY	-1.285	-2.52593	Cluster 4	FRY MICROTUBULE-BINDING PROTEIN
ENSG00000170734	POLH	-1.28694	-2.31998	Cluster 4	POLYMERASE, DNA, ETA
ENSG00000156113	KCNMA1	-1.29563	-2.93543	Cluster 4	POTASSIUM CHANNEL, CALCIUM-ACTIVATED, LARGE CONDUCTANCE, SUBFAMILY M
ENSG00000109670	FBXW7	-1.30138	-3.01274	Cluster 4	F-BOX AND WD40 DOMAIN PROTEIN 7
ENSG00000166780	BMERB1	-1.30293	-2.73177	Cluster 4	BMERB DOMAIN CONTAINIING 1
ENSG00000187720	THSD4	-1.30384	-1.26823	Cluster 4	THROMBOSPONDIN TYPE-1 DOMAIN-CONTAINING PROTEIN 4
ENSG00000026025	VIM	-1.31018	-1.76508	Cluster 4	VIMENTIN
ENSG00000168646	AXIN2	-1.31329	-2.54486	Cluster 4	AXIS INHIBITOR 2
ENSG00000075826	SEC31B	-1.31354	-2.55273	Cluster 4	COPII coat complex component
ENSG00000146592	CREB5	-1.31623	-1.981	Cluster 4	cAMP RESPONSE ELEMENT-BINDING PROTEIN 5
ENSG00000167202	TBC1D2B	-1.31937	-2.01758	Cluster 4	TBC1 DOMAIN FAMILY MEMBER 2B
ENSG00000088280	ASAP3	-1.33038	-1.25815	Cluster 4	ankyrin repeat and PH domain 3,ARF GTPase-ACTIVATING PROTEIN WITH SH3 DOMAIN
ENSG00000213918	DNASE1	-1.34352	-2.3872	Cluster 4	DEOXYRIBONUCLEASE II, LYSOSOMAL
ENSG00000119514	GALNT12	-1.35365	-2.95812	Cluster 4	UDP-N-ACETYL-ALPHA-D-GALACTOSAMINE:POLYPEPTIDE N-ACETYLGALACTOSAMINYLTRANSFERASE 12
ENSG00000170500	LONRF2	-1.35366	-2.46183	Cluster 4	LON Peptidase N-Terminal Domain And Ring Finger 2
ENSG00000131981	LGALS3	-1.3564	-2.18389	Cluster 4	LECTIN GALACTOSIDE-BINDING SOLUBLE 3
ENSG00000198873	GRK5	-1.3687	-2.51024	Cluster 4	G PROTEIN-COUPLED RECEPTOR KINASE 5
ENSG00000162542	TMCO4	-1.36901	-2.04029	Cluster 4	TRANSMEMBRANE AND COILED-COIL DOMAINS 4
ENSG00000197093	GAL3ST4	-1.38035	-2.01148	Cluster 4	GALACTOSE-3-O-SULFOTRANSFERASE 4
ENSG00000171533	MAP6	-1.38052	-2.78042	Cluster 4	MICROTUBULE-ASSOCIATED PROTEIN 6
ENSG00000141576	RNF157	-1.39938	-1.71053	Cluster 4	RING FINGER PROTEIN 157
ENSG00000121310	ECHDC2	-1.40096	-1.80086	Cluster 4	ENOYL-CoA HYDRATASE DOMAIN CONTAINING 2
ENSG00000130653	PNPLA7	-1.40521	-1.34477	Cluster 4	PATATIN-LIKE PHOSPHOLIPASE DOMAIN-CONTAINING PROTEIN 7
ENSG00000150687	PRSS23	-1.41083	-1.83487	Cluster 4	PROTEASE SERINE 23
ENSG00000124212	PTGIS	-1.42401	-2.16533	Cluster 4	PROSTAGLANDIN I2 SYNTHASE
ENSG00000182606	TRAK1	-1.44259	-1.80434	Cluster 4	TRAFFICKING PROTEIN, KINESIN-BINDING 1
ENSG00000063438	AHRR	-1.44434	-1.79348	Cluster 4	ARYLHYDROCARBON RECEPTOR REPRESSOR
ENSG00000124785	NRN1	-1.44696	-2.22916	Cluster 4	NEURITIN 1
ENSG00000162976	SLC66A3	-1.44973	-1.75713	Cluster 4	SOLUTE CARRIER FAMILY 66 MEMEBER 3
ENSG00000069535	MAOB	-1.45772	-2.90403	Cluster 4	MONOAMINE OXIDASE (FLAVIN-CONTAINING) B
ENSG00000196975	ANXA4	-1.46922	-2.91755	Cluster 4	ANNEXIN A4
ENSG00000108799	EZH1	-1.47118	-1.59313	Cluster 4	ENHANCER OF ZESTE 1 POLYCOMB REPRESSIVE COMPLEX 2 SUBUNIT
ENSG00000109099	PMP22	-1.49524	-3.0029	Cluster 4	PERIPHERAL MYELIN PROTEIN 22
ENSG00000186073	CDIN1	-1.50623	-2.94501	Cluster 4	CHROMOSOME 15 OPEN READING FRAME 41
ENSG00000089225	TBX5	-1.50841	-2.48819	Cluster 4	T-BOX TRANSCRIPTION FACTOR 5
ENSG00000163661	PTX3	-1.51364	-2.86482	Cluster 4	PENTRAXIN 3
ENSG00000134138	MEIS2	-1.54863	-2.53431	Cluster 4	MEIS HOMEOBOX 2
ENSG00000167371	PRRT2	-1.54956	-2.11647	Cluster 4	PROLINE-RICH TRANSMEMBRANE PROTEIN 2
ENSG00000153071	DAB2	-1.5509	-2.1544	Cluster 4	DAB ADAPTOR PROTEIN 2
ENSG00000112679	DUSP22	-1.56701	-1.76446	Cluster 4	DUAL-SPECIFICITY PHOSPHATASE 22, JNK PATHWAY-ASSOCIATED PHOSPHATASE
ENSG00000196781	TLE1	-1.56807	-1.4677	Cluster 4	TLE Family Member 1, Transcriptional Corepressor
ENSG00000102935	ZNF423	-1.57248	-1.65489	Cluster 4	ZINC FINGER PROTEIN 423
ENSG00000109794	FAM149A	-1.58145	-2.51511	Cluster 4	FAMILY WITH SEQUENCE SIMILARITY 149 MEMBER A
ENSG00000139597	N4BP2L1	-1.59936	-3.10155	Cluster 4	NEDD4 Binding Protein 2 Like 1
ENSG00000109743	BST1	-1.61296	-1.54268	Cluster 4	BONE MARROW STROMAL CELL ANTIGEN 1
ENSG00000154310	TNIK	-1.61622	-2.40872	Cluster 4	TRAF2- AND NCK-INTERACTING KINASE
ENSG00000072195	SPEG	-1.61624	-1.43417	Cluster 4	SPEG AORTIC PREFERENTIALLY EXPRESSED PROTEIN 1
ENSG00000135749	PCNX2	-1.62149	-2.38034	Cluster 4	PECANEX 2
ENSG00000014914	MTMR11	-1.6297	-2.21316	Cluster 4	MYOTUBULARIN RELATED PROTEIN 11
ENSG00000123892	RAB38	-1.6354	-1.79869	Cluster 4	RAS-ASSOCIATED PROTEIN RAB38
ENSG00000131370	SH3BP5	-1.64821	-3.01647	Cluster 4	SH3 DOMAIN-BINDING PROTEIN 5
ENSG00000126218	F10	-1.66016	-1.44658	Cluster 4	COAGULATION FACTOR 10
ENSG00000081059	TCF7	-1.69015	-1.57139	Cluster 4	TRANSCRIPTION FACTOR 7
ENSG00000162804	SNED1	-1.69148	-1.40311	Cluster 4	NIDOGEN, AND EGF-LIKE DOMAINS PROTEIN 1, STROMAL NIDOGEN EXTRACELLULAR MATRIX PROTEIN
ENSG00000022267	FHL1	-1.69253	-2.62721	Cluster 4	FOUR-AND-A-HALF LIM DOMAINS 1
ENSG00000123700	KCNJ2	-1.69318	-3.01167	Cluster 4	POTASSIUM CHANNEL
ENSG00000164442	CITED2	-1.69758	-1.51686	Cluster 4	CBP/p300-INTERACTING TRANSACTIVATOR, WITH GLU/ASP-RICH C-TERMINAL DOMAIN, 2
ENSG00000169184	MN1	-1.70361	-2.18492	Cluster 4	MN1 PROTOONCOGENE, TRANSCRIPTIONAL REGULATOR;
ENSG00000026297	RNASET2	-1.71248	-2.22293	Cluster 4	RIBONUCLEASE T2
ENSG00000076356	PLXNA2	-1.7191	-2.53006	Cluster 4	PLEXIN A2, TRANSMEMBRANE PROTEIN
ENSG00000146776	ATXN7L1	-1.74371	-2.1687	Cluster 4	ATAXIN 7 LIKE PROTEIN 1
ENSG00000119943	PYROXD2	-1.77422	-1.59891	Cluster 4	PYRIDINE NUCLEOTIDE-DISULPHIDE OXIDOREDUCTASE DOMAIN-CONTAINING PROTEIN 2
ENSG00000132170	PPARG	-1.79542	-1.89952	Cluster 4	PEROXISOME PROLIFERATOR-ACTIVATED RECEPTOR-GAMMA
ENSG00000159023	EPB41	-1.79782	-1.47474	Cluster 4	ERYTHROCYTE MEMBRANE PROTEIN BAND 4.1
ENSG00000008256	CYTH3	-1.80588	-3.02865	Cluster 4	CYTOHESIN 3
ENSG00000178031	ADAMTSL1	-1.81561	-1.19508	Cluster 4	ADAMTS-LIKE PROTEIN 1
ENSG00000166949	SMAD3	-1.81617	-1.87783	Cluster 4	SMAD FAMILY MEMBER 3
ENSG00000152518	ZFP36L2	-1.82125	-2.45713	Cluster 4	ZINC FINGER PROTEIN 36-LIKE 2
ENSG00000149294	NCAM1	-1.8456	-2.8526	Cluster 4	CELL ADHESION MOLECULE NEURAL 1
ENSG00000101638	ST8SIA5	-1.84927	-1.02413	Cluster 4	ST8 ALPHA-N-ACETYL-NEURAMINIDE ALPHA-2,8-SIALYLTRANSFERASE 5
ENSG00000196782	MAML3	-1.8517	-1.56474	Cluster 4	MASTERMIND-LIKE 3
ENSG00000204219	TCEA3	-1.86296	-1.53932	Cluster 4	TRANSCRIPTION ELONGATION FACTOR A, 3
ENSG00000064309	CDON	-1.86626	-2.19185	Cluster 4	CELL ADHESION MOLECULE-RELATED/DOWNREGULATED BY ONCOGENES
ENSG00000110455	ACCS	-1.92407	-1.8452	Cluster 4	1-αAMINOCYCLOPROPANE-1-CARBOXYLATE SYNTHASE
ENSG00000181350	LRRC75A	-1.94962	-1.88932	Cluster 4	LEUCIN RIACH REPEAT CONTAINING 75A
ENSG00000213366	GSTM2	-1.96829	-1.4438	Cluster 4	GLUTATHIONE S-TRANSFERASE
ENSG00000152092	ASTN1	-1.97121	-2.27755	Cluster 4	ASTROTACTIN 1
ENSG00000128284	APOL3	-2.01217	-2.60269	Cluster 4	APOLIPOPROTEIN L-III
ENSG00000131080	EDA2R	-2.01518	-2.85137	Cluster 4	ECTODYSPLASIN A2 RECEPTOR
ENSG00000225968	ELFN1	-2.0174	-1.73012	Cluster 4	EXTRACELLULAR LEUCINE-RICH REPEAT AND FIBRONECTIN TYPE III DOMAIN-CONTAINING PROTEIN 1
ENSG00000151623	NR3C2	-2.02467	-2.39726	Cluster 4	NUCLEAR RECEPTOR SUBFAMILY 3, GROUP C, MEMBER 2
ENSG00000164237	CMBL	-2.03494	-2.92101	Cluster 4	CARBOXYMETHYLENEBUTENOLIDASE-LIKE PROTEIN
ENSG00000054793	ATP9A	-2.03538	-2.99542	Cluster 4	ATPase CLASS II TYPE 9A
ENSG00000146674	IGFBP3	-2.06074	-2.47417	Cluster 4	INSULIN-LIKE GROWTH FACTOR-BINDING PROTEIN 3
ENSG00000134508	CABLES1	-2.09657	-2.36686	Cluster 4	CDK5 AND ABL ENZYME SUBSTRATE 1
ENSG00000110002	VWA5A	-2.11075	-2.4039	Cluster 4	VON WILLEBRAND FACTOR A DOMAIN-CONTAINING PROTEIN 5A
ENSG00000214021	TTLL3	-2.11993	-2.74051	Cluster 4	TUBULIN TYROSINE LIGASE LIKE 3
ENSG00000168502	MTCL1	-2.15077	-2.83236	Cluster 4	MICROTUBULE CROSSLINKING FACTOR 1
ENSG00000108984	MAP2K6	-2.16819	-2.99511	Cluster 4	MITOGEN-ACTIVATED PROTEIN KINASE KINASE 6
ENSG00000185567	AHNAK2	-2.23124	-1.4578	Cluster 4	AHNAK NUCLEOPROTEIN 2
ENSG00000152284	TCF7L1	-2.26225	-1.79067	Cluster 4	TRANSCRIPTION FACTOR 7-LIKE 1
ENSG00000149451	ADAM33	-2.29964	-1.36243	Cluster 4	A DISINTEGRIN AND METALLOPROTEINASE DOMAIN 33
ENSG00000080854	IGSF9B	-2.37464	-2.2015	Cluster 4	IMMUNOGLOBULIN SUPERFAMILY MEMBER 9B
ENSG00000143867	OSR1	-2.47655	-1.66275	Cluster 4	ODD-SKIPPED-RELATED 1
ENSG00000142611	PRDM16	-2.50593	-2.0874	Cluster 4	PR DOMAIN-CONTAINING PROTEIN 16
ENSG00000161381	PLXDC1	-2.59525	-2.72542	Cluster 4	PLEXIN DOMAIN-CONTAINING PROTEIN 1
ENSG00000185585	OLFML2A	-2.60234	-2.68288	Cluster 4	OLFACTOMEDIN-LIKE 2A
ENSG00000105339	DENND3	-2.71421	-1.59697	Cluster 4	DENN DOMAIN-CONTAINING PROTEIN 3
ENSG00000168477	TNXB	-2.76385	-1.3685	Cluster 4	TENASCIN XB
ENSG00000143127	ITGA10	-2.81082	-1.95064	Cluster 4	INTEGRIN ALPHA-10
ENSG00000163431	LMOD1	-2.83295	-2.50352	Cluster 4	LEIOMODIN 1, THYROID AND EYE MUSCLE AUTOANTIGEN, 64-KD
ENSG00000099953	MMP11	-2.84713	-2.26308	Cluster 4	MATRIX METALLOPROTEINASE 11
ENSG00000100065	CARD10	-2.9322	-1.82535	Cluster 4	CASPASE RECRUITMENT DOMAIN-CONTAINING PROTEIN 10
ENSG00000143772	ITPKB	-2.99051	-2.18487	Cluster 4	INOSITOL 1,4,5-TRISPHOSPHATE 3-KINASE B
ENSG00000104368	PLAT	-3.02845	-1.73472	Cluster 4	PLASMINOGEN ACTIVATOR
ENSG00000174348	PODN	-3.11166	-1.29648	Cluster 4	PODOCAN
ENSG00000177363	LRRN4CL	-3.19117	-1.54373	Cluster 4	LRRN4 C-Terminal Like
ENSG00000141574	SECTM1	-3.4068	-1.11584	Cluster 4	SECRETED AND TRANSMEMBRANE 1
ENSG00000130592	LSP1	-3.56661	-2.71782	Cluster 4	LYMPHOCYTE-SPECIFIC PROTEIN
ENSG00000183508	TENT5C	-3.69538	-1.36729	Cluster 4	TERMINAL NUCLEOTIDYLTRANSFERASE 5C
ENSG00000169418	NPR1	-3.77673	-1.63929	Cluster 4	NATRIURETIC PEPTIDE RECEPTOR A/GUANYLATE CYCLASE A
ENSG00000167992	VWCE	-4.01161	-1.35787	Cluster 4	VON WILLEBRAND FACTOR C AND EGF DOMAIN-CONTAINING PROTEIN
ENSG00000166106	ADAMTS15	-4.73012	-1.33923	Cluster 4	A DISINTEGRIN-LIKE AND METALLOPROTEINASE WITH THROMBOSPONDIN TYPE 1 MOTIF, 15
ENSG00000122641	INHBA	5.3637	-2.50787	Cluster 5	INHIBIN, BETA A;FOLLICLE-STIMULATING HORMONE-RELEASING PROTEIN
ENSG00000152952	PLOD2	4.50996	-3.9962	Cluster 5	PROCOLLAGEN-LYSINE, 2-OXOGLUTARATE 5-DIOXYGENASE 2
ENSG00000170961	HAS2	4.25433	-2.9911	Cluster 5	HYALURONAN SYNTHASE 2
ENSG00000105835	NAMPT	3.94045	-1.54424	Cluster 5	NICOTINAMIDE PHOSPHORIBOSYLTRANSFERASE
ENSG00000104321	TRPA1	3.87127	-4.75794	Cluster 5	TRANSIENT RECEPTOR POTENTIAL CATION CHANNEL, SUBFAMILY A, MEMBER 1
ENSG00000112972	HMGCS1	3.73174	-2.37332	Cluster 5	3-αHYDROXY-3-METHYLGLUTARYL-CoA SYNTHASE 1
ENSG00000196611	MMP1	3.6845	-1.80165	Cluster 5	MATRIX METALLOPROTEINASE 1; MMP1;;COLLAGENASE, FIBROBLAST
ENSG00000067064	IDI1	3.56321	-2.32965	Cluster 5	ISOPENTENYL-DIPHOSPHATE DELTA ISOMERASE 1
ENSG00000041353	RAB27B	3.40298	-6.85252	Cluster 5	MEMBER RAS ONCOGENE FAMILY
ENSG00000104415	CCN4	3.3904	-2.86912	Cluster 5	WNT1-INDUCIBLE SIGNALING PATHWAY PROTEIN 1
ENSG00000157214	STEAP2	3.38766	-2.91502	Cluster 5	STEAP2 METALLOREDUCTASE, SIX-TRANSMEMBRANE EPITHELIAL ANTIGEN OF PROSTATE 2
ENSG00000164211	STARD4	3.13915	-2.38458	Cluster 5	START DOMAIN-CONTAINING PROTEIN 4
ENSG00000119927	GPAM	3.1344	-4.01818	Cluster 5	mitochondrial,GLYCEROL-3-PHOSPHATE ACYLTRANSFERASE, MITOCHONDRIAL
ENSG00000120437	ACAT2	3.10705	-2.60499	Cluster 5	ACETYL-CoA ACETYLTRANSFERASE 2
ENSG00000171208	NETO2	3.08561	-1.57174	Cluster 5	NEUROPILIN- AND TOLLOID-LIKE 2
ENSG00000153823	PID1	3.00261	-1.63655	Cluster 5	PHOSPHOTYROSINE INTERACTION DOMAIN-CONTAINING 1
ENSG00000153162	BMP6	2.88827	-2.04831	Cluster 5	BONE MORPHOGENETIC PROTEIN 6
ENSG00000164647	STEAP1	2.80143	-2.35688	Cluster 5	STEAP FAMILY MEMBER 1
ENSG00000135048	CEMIP2	2.75916	-2.24193	Cluster 5	TRANSMEMBRANE PROTEIN 2
ENSG00000113161	HMGCR	2.69945	-2.12917	Cluster 5	3-αHYDROXY-3-METHYLGLUTARYL-CoA REDUCTASE
ENSG00000114251	WNT5A	2.69738	-2.10202	Cluster 5	WINGLESS-TYPE MMTV INTEGRATION SITE FAMILY, MEMBER 5A
ENSG00000182752	PAPPA	2.6725	-1.71689	Cluster 5	PREGNANCY-ASSOCIATED PLASMA PROTEIN A
ENSG00000125845	BMP2	2.61264	-2.26175	Cluster 5	BONE MORPHOGENETIC PROTEIN 2, REGULATORY ELEMENT, CIS-ACTING, ENHANCER,
ENSG00000144810	COL8A1	2.5954	-2.67304	Cluster 5	COLLAGEN, TYPE VIII, ALPHA-1
ENSG00000140416	TPM1	2.40455	-3.16741	Cluster 5	TROPOMYOSIN 1
ENSG00000068366	ACSL4	2.3376	-5.44257	Cluster 5	ACYL-CoA SYNTHETASE LONG CHAIN FAMILY, MEMBER 4
ENSG00000140285	FGF7	2.29566	-5.15621	Cluster 5	FIBROBLAST GROWTH FACTOR 7
ENSG00000072274	TFRC	2.06863	-2.52243	Cluster 5	TRANSFERRIN RECEPTOR
ENSG00000100644	HIF1A	2.04688	-5.06855	Cluster 5	HYPOXIA-INDUCIBLE FACTOR 1, ALPHA SUBUNIT
ENSG00000148848	ADAM12	2.01668	-3.54179	Cluster 5	DISINTEGRIN AND METALLOPROTEINASE DOMAIN 12
ENSG00000131459	GFPT2	2.00824	-1.74208	Cluster 5	GLUTAMINE:FRUCTOSE-6-PHOSPHATE AMIDOTRANSFERASE 2
ENSG00000169855	ROBO1	1.9489	-3.29683	Cluster 5	ROUNDABOUT GUIDANCE RECEPTOR 1
ENSG00000039560	RAI14	1.93455	-4.62258	Cluster 5	RETINOIC ACID-INDUCED 14
ENSG00000122884	P4HA1	1.91685	-2.80774	Cluster 5	PROCOLLAGEN-PROLINE, 2-OXOGLUTARATE-4-DIOXYGENASE
ENSG00000171617	ENC1	1.84531	-4.03639	Cluster 5	ECTODERMAL-NEURAL CORTEX 1
ENSG00000145555	MYO10	1.62291	-2.908	Cluster 5	MYOSIN X
ENSG00000145623	OSMR	1.54781	-2.76597	Cluster 5	ONCOSTATIN M RECEPTOR
ENSG00000158290	CUL4B	1.51267	-5.05632	Cluster 5	CULLIN 4B
ENSG00000075223	SEMA3C	1.48054	-4.85062	Cluster 5	SEMAPHORIN 3C
ENSG00000074695	LMAN1	1.46956	-3.53443	Cluster 5	LECTIN, MANNOSE-BINDING, 1
ENSG00000135919	SERPINE2	1.19154	-2.40308	Cluster 5	SERPIN PEPTIDASE INHIBITOR, CLADE E (NEXIN, PLASMINOGEN ACTIVATOR INHIBITOR TYPE 1), MEMBER 2
ENSG00000166250	CLMP	1.17705	-4.50188	Cluster 5	COXSACKIEVIRUS- AND ADENOVIRUS RECEPTOR-LIKE MEMBRANE PROTEIN; ADIPOCYTE-SPECIFIC ADHESION MOLECULE
ENSG00000136244	IL6	7.20559	3.61247	Cluster 6	INTERLEUKIN 6
ENSG00000081041	CXCL2	7.08728	5.19478	Cluster 6	CHEMOKINE, CXC MOTIF, LIGAND 2
ENSG00000125538	IL1B	6.58615	1.75895	Cluster 6	INTERLEUKIN 1-BETA
ENSG00000108691	CCL2	6.30046	2.02419	Cluster 6	CHEMOKINE, CC MOTIF, LIGAND 2; MONOCYTE CHEMOTACTIC PROTEIN 1
ENSG00000128342	LIF	5.98823	2.48328	Cluster 6	LEUKEMIA-INHIBITORY FACTOR
ENSG00000123610	TNFAIP6	5.27329	3.01945	Cluster 6	TUMOR NECROSIS FACTOR-ALPHA-INDUCED PROTEIN 6
ENSG00000137331	IER3	5.04685	5.01307	Cluster 6	IMMEDIATE-EARLY RESPONSE 3
ENSG00000105825	TFPI2	4.96812	1.50294	Cluster 6	TISSUE FACTOR PATHWAY INHIBITOR 2
ENSG00000099194	SCD	4.81579	2.20223	Cluster 6	STEAROYL-CoA DESATURASE
ENSG00000136689	IL1RN	4.75395	4.23589	Cluster 6	INTERLEUKIN 1 RECEPTOR ANTAGONIST
ENSG00000172893	DHCR7	4.08731	4.13599	Cluster 6	7-αDEHYDROCHOLESTEROL REDUCTASE
ENSG00000103257	SLC7A5	4.06808	6.53945	Cluster 6	SOLUTE CARRIER FAMILY 7 (CATIONIC AMINO ACID TRANSPORTER, y+ SYSTEM)
ENSG00000198959	TGM2	3.80596	1.54039	Cluster 6	TRANSGLUTAMINASE 2;
ENSG00000186480	INSIG1	3.74722	1.18096	Cluster 6	INSULIN-INDUCED GENE 1
ENSG00000173918	C1QTNF1	3.56937	4.65914	Cluster 6	C1q- AND TUMOR NECROSIS FACTOR-RELATED PROTEIN 1
ENSG00000006118	TMEM132A	3.54933	1.95003	Cluster 6	TRANSMEMBRANE PROTEIN 132A
ENSG00000148344	PTGES	3.33229	3.92603	Cluster 6	PROSTAGLANDIN E SYNTHASE
ENSG00000141526	SLC16A3	3.10392	4.55523	Cluster 6	SOLUTE CARRIER FAMILY 16 (MONOCARBOXYLIC ACID TRANSPORTER), MEMBER 3
ENSG00000106366	SERPINE1	2.99229	2.74821	Cluster 6	SERPIN PEPTIDASE INHIBITOR, CLADE E (NEXIN, PLASMINOGEN ACTIVATOR INHIBITOR TYPE 1), MEMBER 1
ENSG00000143878	RHOB	2.96076	3.13317	Cluster 6	RAS HOMOLOG GENE FAMILY, MEMBER B
ENSG00000134107	BHLHE40	2.85679	1.23542	Cluster 6	BASIC HELIX-LOOP-HELIX FAMILY, MEMBER E40
ENSG00000130164	LDLR	2.84635	2.53895	Cluster 6	LOW DENSITY LIPOPROTEIN RECEPTORR
ENSG00000088826	SMOX	2.71907	4.86556	Cluster 6	SPERMINE OXIDASE
ENSG00000085662	AKR1B1	2.70385	2.43349	Cluster 6	ALDO-KETO REDUCTASE FAMILY 1, MEMBER B1
ENSG00000168209	DDIT4	2.56363	5.07041	Cluster 6	DNA DAMAGE-INDUCIBLE TRANSCRIPT 4
ENSG00000085117	CD82	2.51561	2.57787	Cluster 6	PROSTATE CANCER ANTIMETASTASIS GENE KAI1;LEUKOCYTE SURFACE ANTIGEN R2
ENSG00000160752	FDPS	2.48574	1.18445	Cluster 6	FARNESYL DIPHOSPHATE SYNTHASE
ENSG00000104635	SLC39A14	2.46106	1.60691	Cluster 6	SOLUTE CARRIER FAMILY 39 (ZINC TRANSPORTER), MEMBER 14
ENSG00000095303	PTGS1	2.40934	2.64521	Cluster 6	PROSTAGLANDIN-ENDOPEROXIDE SYNTHASE 1; COX1
ENSG00000172061	LRRC15	2.36898	1.39145	Cluster 6	Leucine Rich Repeat Containing 15
ENSG00000249992	TMEM158	2.24579	2.24076	Cluster 6	Transmembrane Protein 158
ENSG00000086062	B4GALT1	2.14044	1.44185	Cluster 6	1,BETA-1,4-GALACTOSYLTRANSFERASE 1; B4GALT1
ENSG00000067057	PFKP	1.84728	1.22744	Cluster 6	HOSPHOFRUCTOKINASE, PLATELET TYPE
ENSG00000102144	PGK1	1.82496	1.74366	Cluster 6	PHOSPHOGLYCERATE KINASE 1
ENSG00000111669	TPI1	1.74516	3.9358	Cluster 6	TRIOSEPHOSPHATE ISOMERASE 1
ENSG00000107957	SH3PXD2A	1.37738	1.32457	Cluster 6	SH3 And PX Domains 2A
ENSG00000175166	PSMD2	1.32619	1.52339	Cluster 6	PROTEASOME 26S SUBUNIT, NON-ATPASE, 2; TUMOR NECROSIS FACTOR RECEPTOR-ASSOCIATED PROTEIN 2
ENSG00000163517	HDAC11	-1.01064	2.62293	Cluster 7	HISTONE DEACETYLASE 11
ENSG00000075618	FSCN1	-1.02478	2.07023	Cluster 7	FASCIN ACTIN-BUNDLING PROTEIN 1
ENSG00000167106	FAM102A	-1.03057	3.84664	Cluster 7	FAMILY WITH SEQUENCE SIMILARITY 102, MEMBER A
ENSG00000013364	MVP	-1.03134	2.15876	Cluster 7	MAJOR VAULT PROTEIN
ENSG00000171045	TSNARE1	-1.03583	1.69689	Cluster 7	T-SNARE Domain Containing 1
ENSG00000110651	CD81	-1.04379	1.282	Cluster 7	CD81 ANTIGEN; CD81
ENSG00000117984	CTSD	-1.05011	2.45568	Cluster 7	CATHEPSIN D
ENSG00000146054	TRIM7	-1.0617	2.97551	Cluster 7	TRIPARTITE MOTIF-CONTAINING PROTEIN 7
ENSG00000168237	GLYCTK	-1.0617	2.86413	Cluster 7	GLYCERATE KINASE
ENSG00000198715	GLMP	-1.07408	2.01442	Cluster 7	Glycosylated Lysosomal Membrane Protein
ENSG00000103174	NAGPA	-1.08196	1.54702	Cluster 7	N-ACETYLGLUCOSAMINE-1-PHOSPHODIESTER ALPHA-N-ACETYLGLUCOSAMINIDASE
ENSG00000105516	DBP	-1.0907	2.03221	Cluster 7	D-BOX-BINDING PAR bZIP TRANSCRIPTION FACTOR
ENSG00000162576	MXRA8	-1.09137	2.35468	Cluster 7	MATRIX REMODELING-ASSOCIATED PROTEIN 8
ENSG00000107731	UNC5B	-1.09295	2.22229	Cluster 7	UNC5 NETRIN RECEPTOR B
ENSG00000172830	SSH3	-1.09369	1.10559	Cluster 7	SLINGSHOT PROTEIN PHOSPHATASE 3
ENSG00000107521	HPS1	-1.09486	1.32719	Cluster 7	HPS1 BIOGENESIS OF LYSOSOMAL ORGANELLES COMPLEX 3, SUBUNIT 1
ENSG00000124104	SNX21	-1.09572	1.78748	Cluster 7	SORTING FAMILY MEMBER 21
ENSG00000100994	PYGB	-1.09577	2.30761	Cluster 7	GLYCOGEN PHOSPHORYLASE, BRAIN TYPE
ENSG00000178980	SELENOW	-1.10649	1.27852	Cluster 7	SELENOPROTEIN W
ENSG00000175602	CCDC85B	-1.11223	1.45158	Cluster 7	COILED-COIL DOMAIN-CONTAINING PROTEIN 85B
ENSG00000100307	CBX7	-1.11262	1.47564	Cluster 7	CHROMOBOX 7
ENSG00000126351	THRA	-1.12613	1.13955	Cluster 7	THYROID HORMONE RECEPTOR, ALPHA-1; THYROID HORMONE RECEPTOR, CENTRAL NERVOUS SYSTEM FORM; THRA1;;ERBA-ALPHA;;ONCOGENE ERBA; ERBA;;ERBA-RELATED 7; EAR7;;V-ERB-A AVIAN ERYTHROBLASTIC LEUKEMIA VIRAL ONCOGENE HOMOLOG 1; ERBA1 THYROID HORMONE RECEP
ENSG00000204851	PNMA8B	-1.13594	1.95927	Cluster 7	PNMA Family Member 8B
ENSG00000104936	DMPK	-1.1434	1.23301	Cluster 7	DYSTROPHIA MYOTONICA PROTEIN KINASE
ENSG00000142694	EVA1B	-1.15417	1.99974	Cluster 7	Eva-1 Homolog B
ENSG00000108840	HDAC5	-1.15742	2.01986	Cluster 7	HISTONE DEACETYLASE 5
ENSG00000211584	SLC48A1	-1.16708	1.31496	Cluster 7	HEME-RESPONSIVE GENE 1
ENSG00000174791	RIN1	-1.17629	3.21076	Cluster 7	RAS AND RAB INTERACTOR 1
ENSG00000130244	FAM98C	-1.17886	1.60845	Cluster 7	FAMILY WITH SEQUENCE SIMILARITY 98 Member C
ENSG00000006282	SPATA20	-1.1877	1.10931	Cluster 7	SPERMATOGENESIS-ASSOCIATED PROTEIN 20
ENSG00000221995	TIAF1	-1.20362	2.55626	Cluster 7	TGFB1-INDUCED ANTIAPOPTOTIC FACTOR 1
ENSG00000142669	SH3BGRL3	-1.20641	2.29582	Cluster 7	SH3 DOMAIN-BINDING GLUTAMIC ACID-RICH PROTEIN-LIKE PROTEIN 3
ENSG00000175573	C11orf68	-1.21114	2.05942	Cluster 7	Chromosome 11 Open Reading Frame 68
ENSG00000178209	PLEC	-1.21254	1.57688	Cluster 7	PLECTIN
ENSG00000090238	YPEL3	-1.21926	1.56509	Cluster 7	YIPPEE-LIKE 3
ENSG00000196576	PLXNB2	-1.22488	1.48736	Cluster 7	PLEXIN B2
ENSG00000136059	VILL	-1.22857	1.35254	Cluster 7	Villin Like
ENSG00000245532	NEAT1	-1.23907	2.35282	Cluster 7	NONCODING NUCLEAR-ENRICHED ABUNDANT TRANSCRIPT 1
ENSG00000239697	TNFSF12	-1.24286	1.17375	Cluster 7	TUMOR NECROSIS FACTOR LIGAND SUPERFAMILY, MEMBER 12
ENSG00000162302	RPS6KA4	-1.24619	2.24441	Cluster 7	RIBOSOMAL PROTEIN S6 KINASE, 90-KD, 4
ENSG00000106948	AKNA	-1.25627	2.69407	Cluster 7	AT-HOOK TRANSCRIPTION FACTOR AKNA
ENSG00000203485	INF2	-1.25903	2.58374	Cluster 7	INVERTED FORMIN 2
ENSG00000160325	CACFD1	-1.27456	3.0948	Cluster 7	CALCIUM CHANNEL FLOWER-DOMAIN CONTAINING PROTEIN 1
ENSG00000006015	REX1BD	-1.27519	1.4986	Cluster 7	REQUIRED FOR EXCISION 1-B DOMAIN CONTAINING
ENSG00000130511	SSBP4	-1.28356	1.91657	Cluster 7	SINGLE-STRANDED DNA-BINDING PROTEIN 4
ENSG00000177000	MTHFR	-1.28679	2.30099	Cluster 7	5,10-αMETHYLENETETRAHYDROFOLATE REDUCTASE
ENSG00000175220	ARHGAP1	-1.30367	1.7609	Cluster 7	RHO GTPase-ACTIVATING PROTEIN 1
ENSG00000102878	HSF4	-1.31957	1.78725	Cluster 7	HEAT-SHOCK TRANSCRIPTION FACTOR 4
ENSG00000130787	HIP1R	-1.32416	1.49905	Cluster 7	HUNTINGTIN-INTERACTING PROTEIN 1-RELATED PROTEIN
ENSG00000042493	CAPG	-1.36387	1.07987	Cluster 7	CAPPING PROTEIN (Actin Filament), GELSON-LIKE
ENSG00000187609	EXD3	-1.36988	2.12645	Cluster 7	Exonuclease 3'-5' Domain Containing 3
ENSG00000120896	SORBS3	-1.37584	1.57674	Cluster 7	SORBIN AND SH3 DOMAINS-CONTAINING PROTEIN 3; SORBS3;;SH3 DOMAIN-CONTAINING ADAPTOR MOLECULE 1
ENSG00000189129	PLAC9	-1.39607	1.40973	Cluster 7	PLACENTA-SPECIFIC GENE 9
ENSG00000114544	SLC41A3	-1.41437	1.21125	Cluster 7	SOLUTE CARRIER FAMILY 41
ENSG00000175866	BAIAP2	-1.4374	2.18431	Cluster 7	BAI1-ASSOCIATED PROTEIN 2
ENSG00000187091	PLCD1	-1.43785	2.4124	Cluster 7	PHOSPHOLIPASE C, DELTA-1
ENSG00000171345	KRT19	-1.43877	1.3253	Cluster 7	KERATIN 19
ENSG00000126107	HECTD3	-1.44836	2.24298	Cluster 7	HECT DOMAIN-CONTAINING E3 UBIQUITIN PROTEIN LIGASE 3
ENSG00000184524	CEND1	-1.45912	2.03757	Cluster 7	CELL CYCLE EXIT AND NEURONAL DIFFERENTIATION 18
ENSG00000213398	LCAT	-1.45947	1.01959	Cluster 7	LECITHIN:CHOLESTEROL ACYLTRANSFERASE
ENSG00000099377	HSD3B7	-1.46886	2.53881	Cluster 7	3 beta- and steroid delta-isomerase 7
ENSG00000072163	LIMS2	-1.46909	1.57039	Cluster 7	LIM AND SENESCENT CELL ANTIGEN-LIKE DOMAINS 2
ENSG00000101400	SNTA1	-1.49843	2.20243	Cluster 7	SYNTROPHIN, ALPHA-1
ENSG00000242028	HYPK	-1.50506	1.62562	Cluster 7	HUNTINGTIN-INTERACTING PROTEIN K
ENSG00000108828	VAT1	-1.57872	2.21073	Cluster 7	VESICLE AMINE TRANSPORT PROTEIN 1
ENSG00000157873	TNFRSF14	-1.58287	2.16012	Cluster 7	TUMOR NECROSIS FACTOR RECEPTOR SUPERFAMILY, MEMBER 14
ENSG00000176428	VPS37D	-1.58717	2.9424	Cluster 7	VPS37D SUBUNIT OF ESCRT-I
ENSG00000140961	OSGIN1	-1.6052	5.60021	Cluster 7	OXIDATIVE STRESS-INDUCED GROWTH INHIBITOR 1
ENSG00000167779	IGFBP6	-1.60539	1.4731	Cluster 7	INSULIN-LIKE GROWTH FACTOR-BINDING PROTEIN 6
ENSG00000128298	BAIAP2L2	-1.6138	2.7959	Cluster 7	BAI1-ASSOCIATED PROTEIN 2-LIKE 2
ENSG00000125966	MMP24	-1.64458	1.78694	Cluster 7	MATRIX METALLOPROTEINASE 24
ENSG00000162066	AMDHD2	-1.65038	2.19815	Cluster 7	Amidohydrolase Domain Containing 2
ENSG00000124191	TOX2	-1.68709	1.76836	Cluster 7	TOX HIGH MOBILITY GROUP BOX FAMILY MEMBER 2
ENSG00000239857	GET4	-1.71797	4.10426	Cluster 7	GOLGI TO ER TRAFFIC PROTEIN 4
ENSG00000160789	LMNA	-1.7533	1.21624	Cluster 7	LAMIN A/C
ENSG00000105327	BBC3	-1.77633	2.12917	Cluster 7	BCL2-BINDING COMPONENT, p53-UPREGULATED MODULATOR OF APOPTOSIS; PUMa
ENSG00000148671	ADIRF	-1.81997	1.25443	Cluster 7	ADIPOGENESIS REGULATORY FACTOR
ENSG00000132613	MTSS2	-1.8731	2.07174	Cluster 7	METASTASIS SUPPRESSOR 1-LIKE PROTEIN
ENSG00000176909	MAMSTR	-1.89218	3.15247	Cluster 7	MEF2-ACTIVATING SAP TRANSCRIPTIONAL REGULATOR
ENSG00000166289	PLEKHF1	-1.89939	3.39649	Cluster 7	PLECKSTRIN HOMOLOGY DOMAIN-CONTAINING PROTEIN, FAMILY F, MEMBER 1
ENSG00000167363	FN3K	-1.92167	2.15085	Cluster 7	FRUCTOSAMINE 3-KINASE
ENSG00000004776	HSPB6	-1.92431	2.10422	Cluster 7	HEAT-SHOCK 27-KD PROTEIN 6
ENSG00000068976	PYGM	-1.92817	1.95225	Cluster 7	GLYCOGEN PHOSPHORYLASE, MUSCLE
ENSG00000161513	FDXR	-1.97102	1.76578	Cluster 7	FERREDOXIN REDUCTASE
ENSG00000140297	GCNT3	-2.0519	1.29039	Cluster 7	GLUCOSAMINYL (N-ACETYL) TRANSFERASE 3, MUCIN-TYPE
ENSG00000177595	PIDD1	-2.19107	2.5779	Cluster 7	LEUCINE-RICH REPEATS- AND DEATH DOMAIN-CONTAINING PROTEIN
ENSG00000095383	TBC1D2	-2.21595	1.51838	Cluster 7	TBC1 DOMAIN FAMILY, MEMBER 2
ENSG00000130518	IQCN	-2.32611	2.85438	Cluster 7	IQ Motif Containing N
ENSG00000079337	RAPGEF3	-2.32794	1.63821	Cluster 7	RAP GUANINE NUCLEOTIDE EXCHANGE FACTOR 3
ENSG00000167994	RAB3IL1	-2.34406	2.27174	Cluster 7	RAB3A Interacting Protein Like 1
ENSG00000148426	PROSER2	-2.368	2.78725	Cluster 7	PrROLINE AND SERINE RICH 2
ENSG00000128016	ZFP36	-2.40397	1.67991	Cluster 7	ZFP36 RING FINGER PROTEIN;
ENSG00000174564	IL20RB	-2.42082	1.63585	Cluster 7	INTERLEUKIN 20 RECEPTOR, BETA
ENSG00000129194	SOX15	-2.72581	1.58493	Cluster 7	TRANSCRIPTION FACTOR 15 SRY-BOX 15
ENSG00000165507	DEPP1	-3.5913	1.40872	Cluster 7	DEPP1 AUTOPHAGY REGULATOR
ENSG00000103316	CRYM	-4.06448	2.44272	Cluster 7	CRYSTALLIN
ENSG00000111728	ST8SIA1	-4.43083	5.45571	Cluster 7	ST8 ALPHA-N-ACETYL-NEURAMINIDE ALPHA-2,8-SIALYLTRANSFERASE 1
			.
